# Supplementary material for: Understanding the reaction mechanism and performances of 3d transition metal cathodes for all-solid-state fluoride ion batteries
Source: Royal Society of Chemistry journal article supplement (doi:10.1039/d0ta08824b), 2020-12-09
Supplement: d0ta08824b1.pdf [file d0ta08824b1.pdf]

*Supporting Information for*

## **Understanding the Reaction Mechanism and Performances of 3d Transition Metal Cathodes for All-solid-state Fluoride Ion Batteries**

*Datong Zhang<sup>1</sup>, Kentaro Yamamoto<sup>1\*</sup>, Aika Ochi<sup>1</sup>, Yanchang Wang<sup>1</sup>, Takahiro Yoshinari<sup>1</sup>, Koji Nakanishi<sup>1</sup>, Hiroyuki Nakano<sup>1</sup>, Hidenori Miki<sup>1,2</sup>, Shinji Nakanishi<sup>2</sup>, Hideki Iba<sup>2</sup>, Tomoki Uchiyama<sup>1</sup>, Toshiki Watanabe<sup>1</sup>, Koji Amezawa<sup>3</sup>, and Yoshiharu Uchimoto<sup>1</sup>*

<sup>1</sup>Graduate School of Human and Environmental Studies, Kyoto University, Yoshida-nihonmatsucho, Sakyo, Kyoto 606-8501, Japan

<sup>2</sup>Battery Research Div., Toyota Motor Corporation, 1200 Mishuku, Shizuoka 410-1193, Japan

<sup>3</sup>IMRAM, Tohoku University, 2-1-1 Katahira, Aoba, Sendai, Miyagi 980-8577, Japan

\*Corresponding Author ([yamamoto.kentaro.4e@kyoto-u.ac.jp](mailto:yamamoto.kentaro.4e@kyoto-u.ac.jp))

ORCID: Kentaro Yamamoto (0000-0002-8739-4246)

**Table S1.** The parameters of RF sputtering on LaF<sub>3</sub> substrate

| <b>Element</b> | <b>Application</b>  | <b>Thickness / nm</b> | <b>RF Sputtering Power / W</b> |
|----------------|---------------------|-----------------------|--------------------------------|
| Cu             | Working electrode   | 2.3                   | 50                             |
| Co             | Working electrode   | 2.3                   | 120                            |
| Ni             | Working electrode   | 2.3                   | 100                            |
| Pb             | Reference electrode | 1000                  | 50                             |
| Pt             | Current collector   | 50                    | 50                             |
| W              | Current collector   | 50                    | 120                            |

RF Sputtering Temperature: Room temperature (~25 °C)

Atmosphere: Argon

Atmosphere pressure: 1.0 Pa

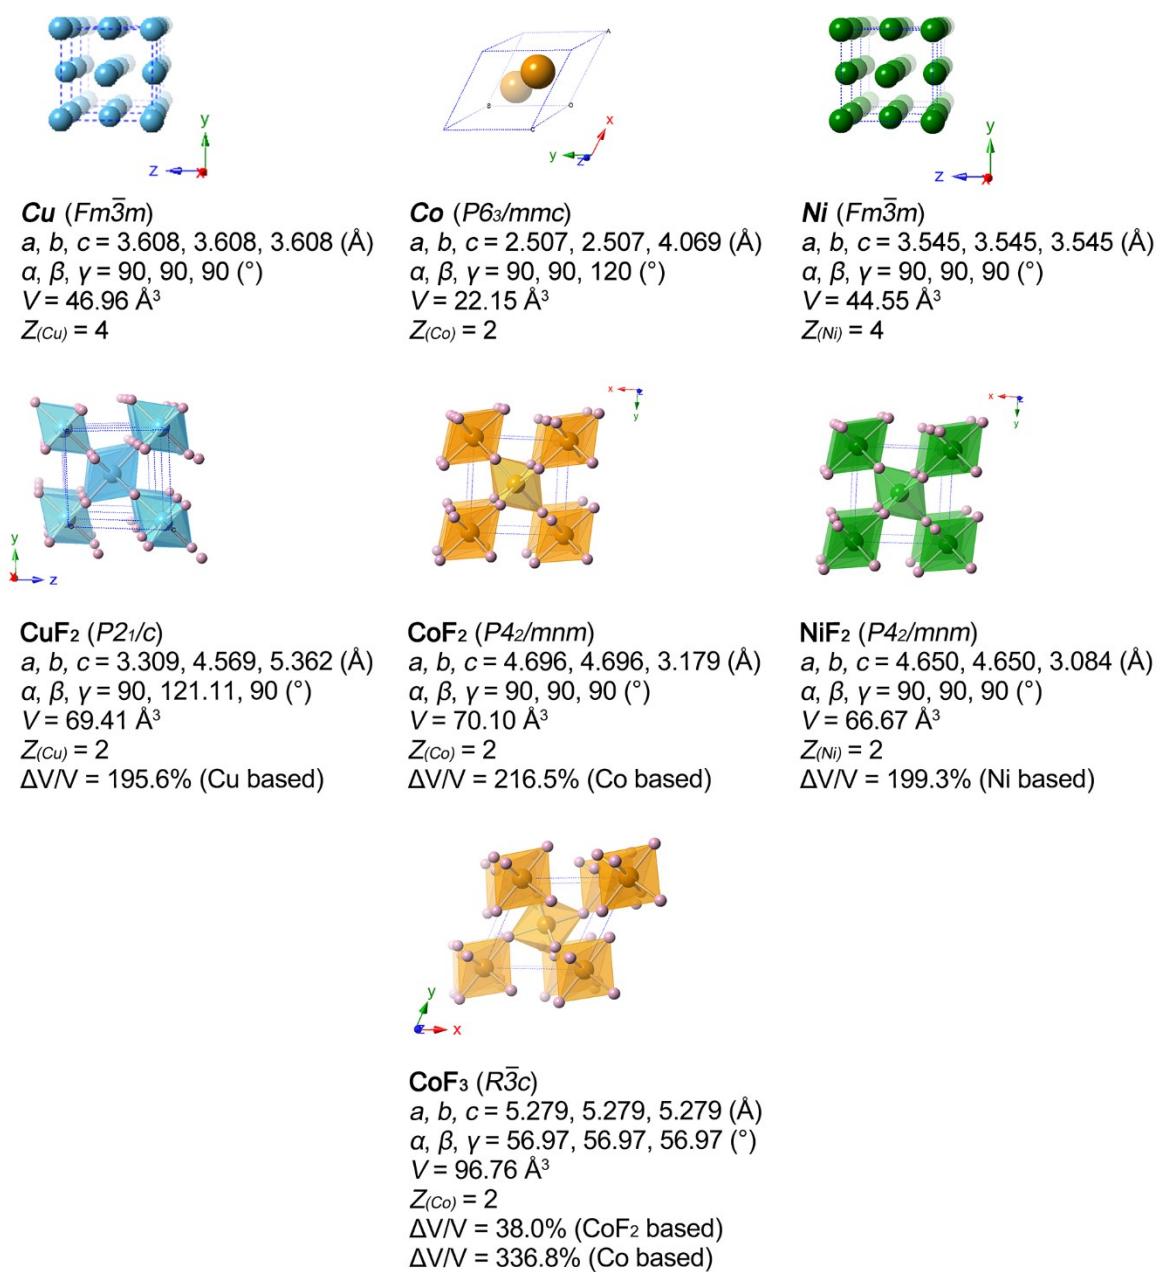

**Figure S1.** The crystallographic models of Cu, Co, Ni and their fluorides. The volumetric changes are listed under each model. <sup>1-6</sup>

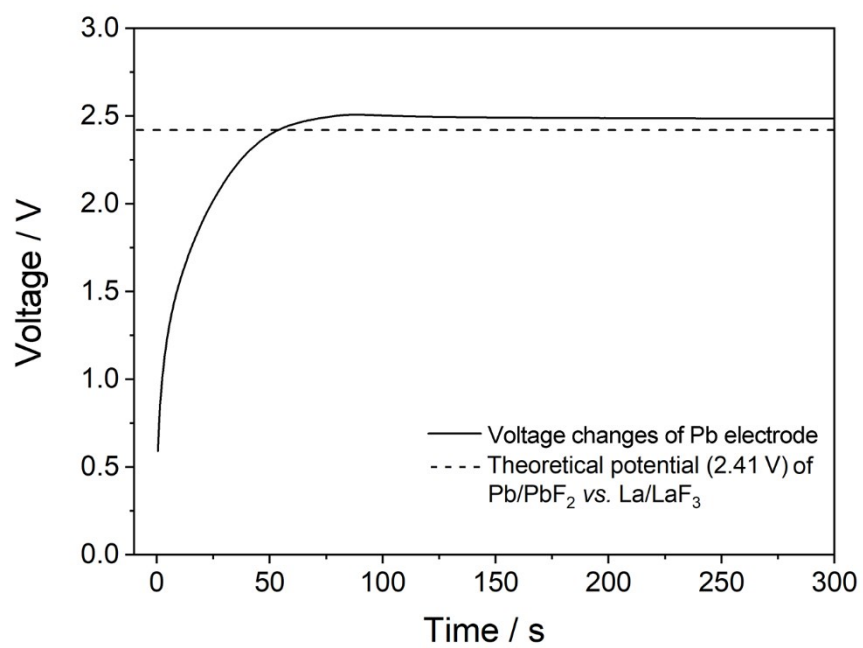

**Figure S2.** The voltage changes of Pb reference electrode versus counter electrode upon pre-fluorination treatment. The dash line represents the theoretical voltage (2.41 V) of Pb/PbF<sub>2</sub> vs. La/LaF<sub>3</sub>.

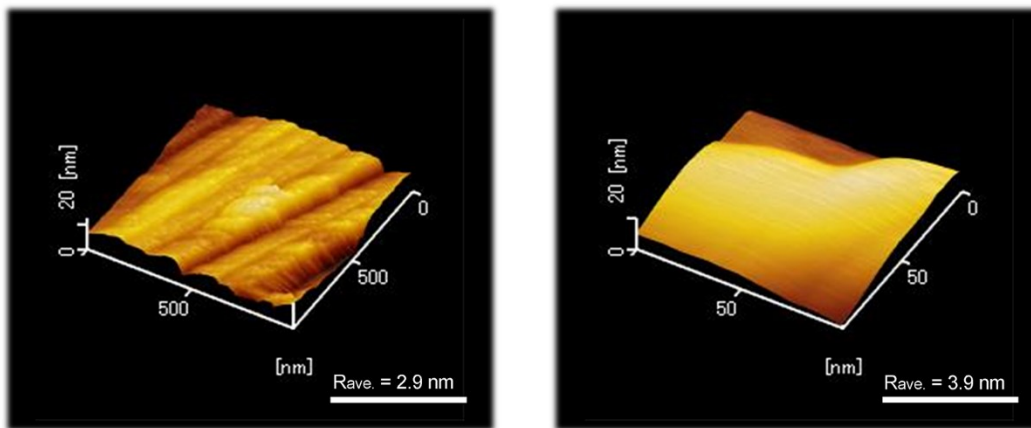

**Figure S3.** Surface smoothness of the substrate. Atomic force microscopy (AFM) images of (a) mirror polished  $\text{LaF}_3$  substrate and (b) Cu deposited  $\text{LaF}_3$  substrate. The surface roughnesses of the substrate before and after the Cu deposition are 2.9 and 3.9 nm, respectively.

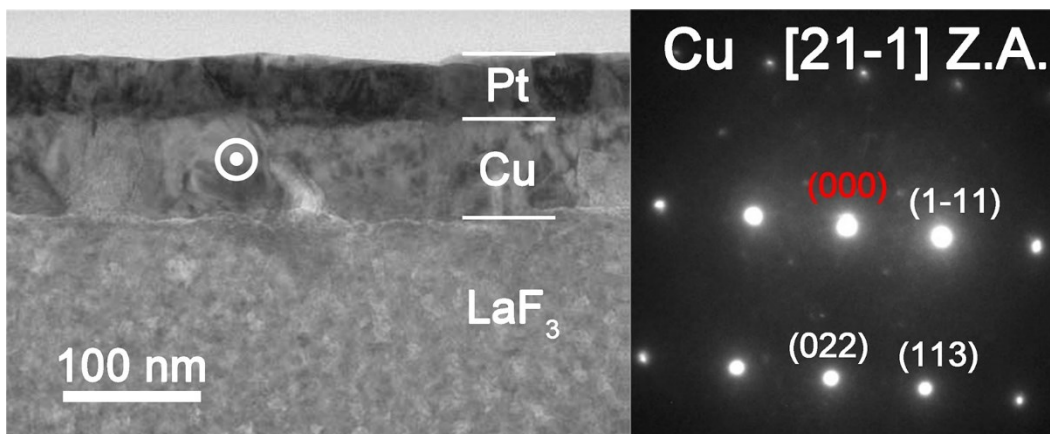

**Figure S4.** The cross-sectional TEM images of Pt, Cu film and LaF<sub>3</sub> substrates, and the nano-area electron diffraction (NAED) patterns of Cu along [21 $\bar{1}$ ] zone axis.

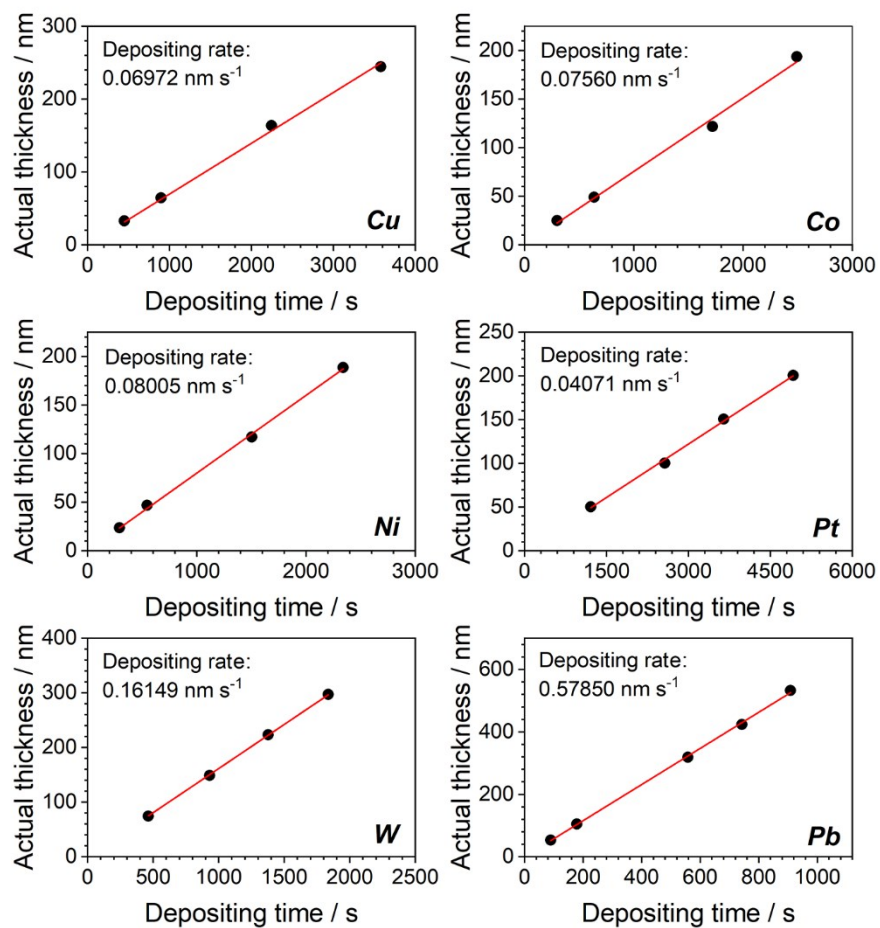

**Figure S5.** The direct proportional fittings ( $y=kx$  model) of depositing rates of all utilized metals.

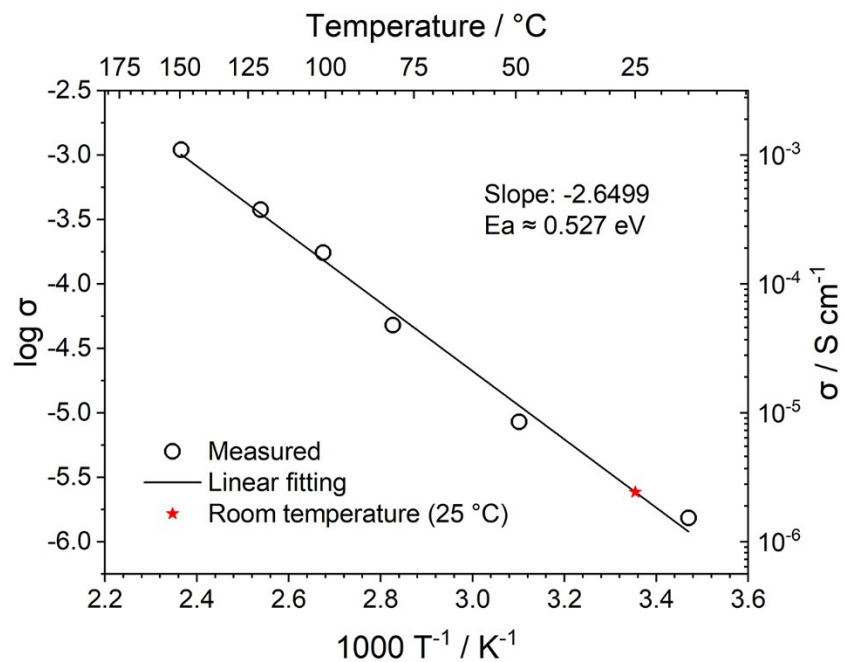

**Figure S6.** The ionic conductivities of  $\text{LaF}_3$  substrates at temperatures of 15, 50, 80, 100, 125, 150 °C, respectively, and corresponding Arrhenius linear fitting.



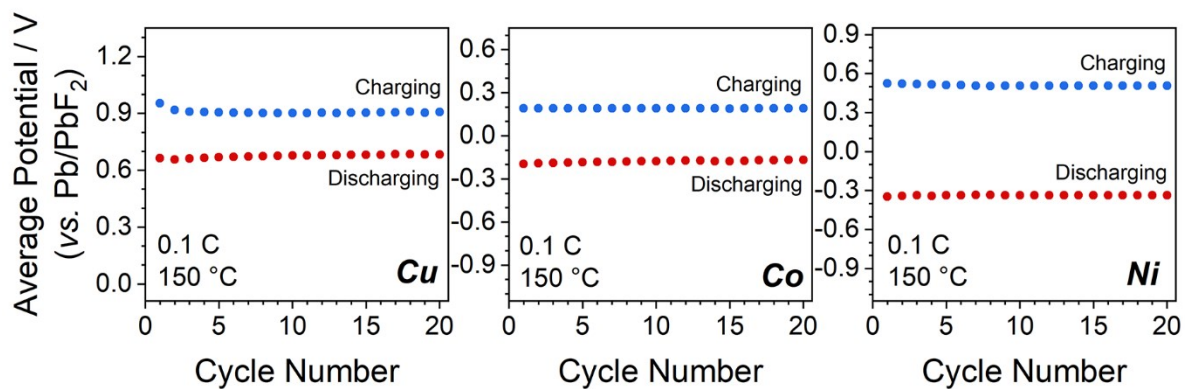

**Figure S7.** The average working potentials in the first 20 cycles of Cu, Co and Ni at 0.1 C and 150 °C.

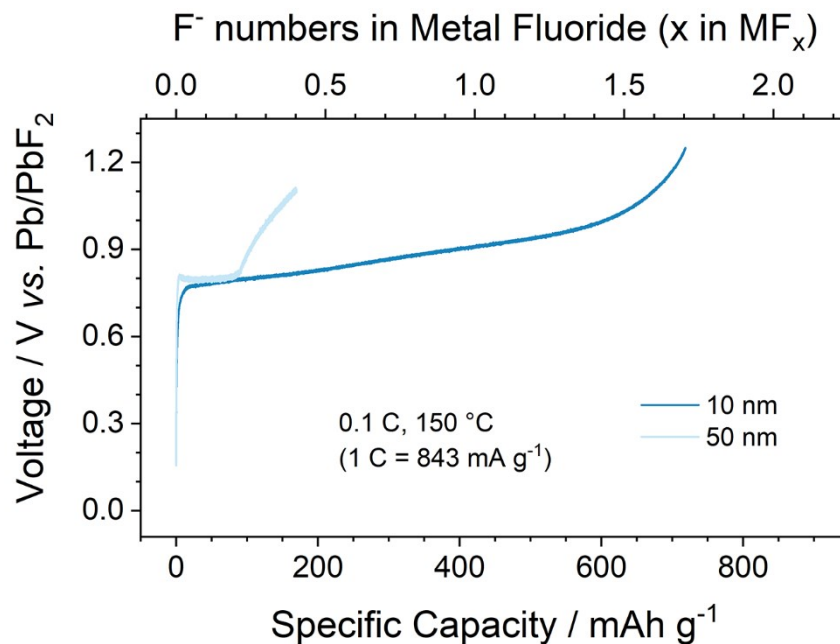

**Figure S8.** The electrochemical properties of Cu with various thicknesses. The 10 nm sample possessed a similar initial performance with 2.3 nm sample in this study, while the thickest sample only delivered an initial charging capacity of 170 mAh g<sup>-1</sup> which corresponded to c.a. 20% of theoretical values, i.e. diffusion depth of 10 nm out of 50 nm.

## REFERENCES

1. Owen, E. A.; Yates, E. L. Precision measurements of crystal parameters Locality: synthetic Sample: at T = 18 °C. *Philos. Mag.* **1933**, *15*, 472-488.
2. Fischer, P.; Hälg, W.; Schwarzenbach, D.; Gamsjäger, H. Magnetic and crystal structure of copper (II) fluoride. *J. Phys. Chem. Solids* **1974**, *35* (12), 1683-1689.
3. Zemmann, J. Crystal structures, 2nd edition. Vol. 1 by R. W. G. Wyckoff. *Acta Crystallogr.* **1965**, *18* (1), 139.
4. Jorgensen, J. E.; Smith, R. I. On the compression mechanism of FeF<sub>3</sub>. *Acta Crystallogr. Sect. B: Struct. Sci.* **2006**, *62* (Pt 6), 987-992.
5. Costa, M. M. R.; Paixão, J. A.; de Almeida, M. J. M.; Andrade, L. C. R. Charge Densities of Two Rutile Structures: NiF<sub>2</sub> and CoF<sub>2</sub>. *Acta Crystallogr. Sect. B: Struct. Sci.* **1993**, *49* (4), 591-599.
6. Hepworth, M. A.; Jack, K. H.; Peacock, R. D.; Westland, G. J. The Crystal Structures of the Trifluorides of Iron, Cobalt, Ruthenium, Rhodium, Palladium and Iridium. *Acta Crystallogr.* **1957**, *10* (1), 63-69.
